# Supplementary material for: Human leucocyte antigen (HLA-DR) gene expression is reduced in sepsis and correlates with impaired TNFα response: A diagnostic tool for immunosuppression?
Source: PubMed Central journal article supplement (PMC5542660; doi:10.1371/journal.pone.0182427), 2017-08-03
Supplement: pone.0182427.s001.pdf [file pone.0182427.s001.pdf]

**S1 Table: Quantitative summary of the research**

| ID | group   | Baseline<br>TNF $\alpha$<br>[pg/mL] | TNF $\alpha$<br>(+LPS 3h)<br>[pg/mL] | TNF $\alpha$<br>fold<br>change | mRNA<br>HLA-DRA<br>(rel. Exp.)* | Ratio<br>(TNF $\alpha$ : HLA-<br>DRA) | SOFA<br>score | SAPS II<br>score | CRP<br>[mg/L] | PCT<br>[ $\mu$ g/L] | IL-6<br>[ng/L] | Leucocytes<br>$\times 10^9$ /L |
|----|---------|-------------------------------------|--------------------------------------|--------------------------------|---------------------------------|---------------------------------------|---------------|------------------|---------------|---------------------|----------------|--------------------------------|
| 1  | control | 12.3                                | 1203.0                               | 97.8                           | N/A                             | N/A                                   | N/A           | N/A              | 6.0           | N/D                 | N/D            | 15.0                           |
| 2  | control | 15.6                                | 1892.0                               | 121.3                          | 0.42                            | 289.8                                 | N/A           | N/A              | 5.0           | N/D                 | N/D            | 8.0                            |
| 3  | control | 15.1                                | 1359.0                               | 90.0                           | 0.74                            | 121.2                                 | N/A           | N/A              | 6.0           | N/D                 | N/D            | 10.2                           |
| 4  | control | 21.0                                | 1524.0                               | 72.6                           | 1.04                            | 70.0                                  | N/A           | N/A              | 5.0           | N/D                 | N/D            | 6.1                            |
| 5  | control | 9.5                                 | 195.0                                | 20.5                           | 1.26                            | 16.3                                  | N/A           | N/A              | 5.0           | N/D                 | N/D            | 3.6                            |
| 6  | control | 13.2                                | 847.0                                | 64.2                           | 2.02                            | 31.8                                  | N/A           | N/A              | 5.0           | N/D                 | N/D            | 7.5                            |
| 7  | control | 23.5                                | 1324.0                               | 56.3                           | 0.94                            | 60.1                                  | N/A           | N/A              | 5.0           | N/D                 | N/D            | 6.9                            |
| 8  | control | 17.1                                | 1125.0                               | 65.8                           | 1.15                            | 57.3                                  | N/A           | N/A              | 5.0           | N/D                 | N/D            | 6.0                            |
| 9  | control | 11.1                                | 1308.0                               | 117.8                          | 1.31                            | 89.6                                  | N/A           | N/A              | 5.0           | N/D                 | N/D            | 7.0                            |
| 10 | control | 13.6                                | 790.0                                | 58.1                           | 0.86                            | 67.4                                  | N/A           | N/A              | 5.0           | N/D                 | N/D            | 7.3                            |
| 11 | Group A | 8.5                                 | 665.0                                | 78.2                           | N/A                             | N/A                                   | 2             | 16               | 105.0         | 0.25                | 258.9          | 14.7                           |
| 12 | Group A | 8.2                                 | 330.0                                | 40.2                           | 0.29                            | 138.1                                 | 1             | 37               | 5.0           | 0.06                | 15.4           | 22.3                           |
| 13 | Group A | 10.8                                | 185.0                                | 17.1                           | 0.20                            | 87.3                                  | 1             | 4                | 8.0           | 0.02                | 9.8            | 15.1                           |
| 14 | Group A | 10.0                                | 331.0                                | 33.1                           | N/A                             | N/A                                   | 7             | 19               | 110.0         | 0.14                | 21.1           | 9.9                            |
| 15 | Group A | 9.0                                 | 326.0                                | 36.2                           | 0.32                            | 113.7                                 | 5             | 29               | 71.0          | 0.55                | 138.7          | 10.9                           |
| 16 | Group A | 9.2                                 | 123.0                                | 13.4                           | 0.04                            | 327.0                                 | 2             | 10               | 27.0          | 0.12                | 13.8           | 22.7                           |
| 17 | Group A | 10.9                                | 538.0                                | 49.4                           | 0.31                            | 156.8                                 | 4             | 23               | 61.0          | 0.17                | 199.1          | 10.6                           |
| 18 | Group A | 12.4                                | 658.0                                | 53.1                           | 1.38                            | 38.5                                  | 6             | 24               | 106.0         | 0.80                | 163.2          | 10.8                           |
| 19 | Group A | 9.6                                 | 245.0                                | 25.5                           | 0.21                            | 124.3                                 | 3             | 35               | 136.0         | 0.31                | 142.7          | 13.6                           |
| 20 | Group A | 14.2                                | 532.0                                | 37.5                           | 0.83                            | 44.9                                  | 5             | 25               | 15.0          | 0.06                | 75.2           | 13.1                           |
| 21 | Group A | 13.5                                | 1232.0                               | 91.3                           | 1.11                            | 82.1                                  | 3             | 9                | 7.0           | 0.11                | 12.9           | 12.9                           |
| 22 | Group A | 11.0                                | 352.0                                | 32.0                           | 0.10                            | 321.9                                 | 5             | 24               | 152.0         | 2.50                | 776.0          | 16.9                           |
| 23 | Group A | 16.1                                | 729.0                                | 45.3                           | 0.22                            | 207.3                                 | 4             | 26               | 21.0          | 2.98                | 35.8           | 23.7                           |
| 24 | Group A | 12.1                                | 724.0                                | 59.8                           | 0.30                            | 202.3                                 | 5             | 32               | 125.0         | 0.17                | 92.9           | 11.9                           |
| 25 | Group A | 18.3                                | 1129.0                               | 61.7                           | 0.55                            | 111.4                                 | 3             | 6                | 86.0          | 0.09                | 27.5           | 13.8                           |
| 26 | Group A | 17.6                                | 335.0                                | 19.0                           | 0.27                            | 71.1                                  | 6             | 24               | 134.0         | 1.57                | 182.7          | 10.9                           |
| 27 | Group A | 23.2                                | 786.0                                | 33.9                           | 0.47                            | 72.0                                  | 7             | 31               | 61.0          | 1.50                | 225.2          | 10.2                           |
| 28 | Group A | 16.1                                | 809.0                                | 50.2                           | 0.41                            | 123.3                                 | 4             | 26               | 80.0          | 0.05                | 55.2           | 10.0                           |
| 29 | Group A | 17.4                                | 420.0                                | 24.1                           | 0.33                            | 72.4                                  | 3             | 20               | 5.0           | 0.52                | 64.4           | 16.1                           |
| 30 | Group A | 14.4                                | 278.0                                | 19.3                           | 0.30                            | 63.8                                  | 5             | 27               | 94.0          | 0.42                | 242.2          | 14.2                           |
| 31 | Group B | 13.2                                | 128.0                                | 9.7                            | N/A                             | N/A                                   | 9             | 36               | 383.0         | 2.82                | 1582.0         | 18.5                           |
| 32 | Group B | 9.7                                 | 140.0                                | 14.4                           | 0.16                            | 89.2                                  | 3             | 23               | 233.0         | 21.64               | 295.2          | 16.7                           |
| 33 | Group B | 10.0                                | 280.0                                | 28.0                           | 0.17                            | 162.1                                 | 5             | 35               | 78.0          | 1.23                | 572.8          | 12.7                           |
| 34 | Group B | 21.1                                | 800.0                                | 37.9                           | 0.32                            | 118.9                                 | 11            | 44               | 166.0         | 7.06                | 321.3          | 12.2                           |
| 35 | Group B | 16.7                                | 50.2                                 | 3.0                            | 0.21                            | 14.4                                  | 8             | 35               | 144.0         | 0.09                | 3.6            | 15.4                           |
| 36 | Group B | 18.8                                | 25.0                                 | 1.3                            | 0.02                            | 63.5                                  | 12            | 41               | 273.0         | 27.40               | 1182.0         | 11.2                           |
| 37 | Group B | 17.6                                | 313.0                                | 17.8                           | N/A                             | N/A                                   | 3             | 27               | 5.0           | 1.33                | 242.8          | 17.8                           |

|    |                    |      |        |      |      |       |    |    |       |       |        |      |
|----|--------------------|------|--------|------|------|-------|----|----|-------|-------|--------|------|
| 38 | Group B            | 11.2 | 61.3   | 5.5  | 0.17 | 31.8  | 7  | 27 | 225.0 | 1.33  | 1135.0 | 5.3  |
| 39 | Group B            | 12.2 | 71.4   | 5.9  | 0.18 | 33.0  | 12 | 27 | 297.0 | 5.70  | 1298.0 | 8.7  |
| 40 | Group B            | 15.8 | 27.9   | 1.8  | 0.07 | 26.8  | 11 | 50 | 193.0 | 3.39  | 458.6  | 1.0  |
| 41 | Group B            | 17.8 | 400.0  | 22.5 | N/A  | N/A   | 7  | 29 | 105.0 | 0.16  | 31.4   | 15.9 |
| 42 | Group B            | 21.5 | 128.0  | 6.0  | 0.07 | 88.2  | 9  | 21 | 301.0 | 3.05  | 69.2   | 20.4 |
| 43 | Group B            | 22.0 | 103.0  | 4.7  | 0.23 | 20.1  | 9  | 28 | 173.0 | 5.17  | 70.3   | 8.0  |
| 44 | Group B            | 24.1 | 783.0  | 32.5 | 0.30 | 109.5 | 9  | 23 | 214.0 | 2.15  | 914.9  | 16.6 |
| 45 | Group B            | 12.2 | 227.0  | 18.6 | 0.32 | 57.4  | 7  | 43 | 96.0  | 1.01  | 643.1  | 31.8 |
| 46 | Group B            | 12.2 | 17.2   | 1.4  | N/A  | N/A   | 11 | 45 | 142.0 | 0.68  | 254.9  | 0.2  |
| 47 | Group B            | 31.4 | 1362.0 | 43.4 | 1.04 | 41.6  | 9  | 28 | 168.0 | 25.47 | 16.4   | 37.8 |
| 48 | Group B            | 15.3 | 112.0  | 7.3  | 0.24 | 30.0  | 6  | 24 | 287.0 | 8.16  | 214.9  | 27.5 |
| 49 | Group B            | 17.5 | 269.0  | 15.4 | 0.36 | 42.5  | 12 | 42 | 260.0 | 5.76  | 128.3  | 8.0  |
| 50 | Group B            | 32.7 | 57.5   | 1.8  | N/A  | N/A   | 12 | 42 | 168.0 | 75.23 | 5000.0 | 3.3  |
| 51 | Validation control | N/A  | N/A    | N/A  | 1.40 | N/A   | 9  | 9  | 105.0 | 0.38  | 40.5   | 8.3  |
| 52 | Validation control | N/A  | N/A    | N/A  | 0.33 | N/A   | 8  | 43 | 129.0 | 1.17  | 94.0   | 6.3  |
| 53 | Validation control | N/A  | N/A    | N/A  | 0.52 | N/A   | 14 | 57 | 35.0  | 2.02  | 328.0  | 12.0 |
| 54 | Validation control | N/A  | N/A    | N/A  | 0.14 | N/A   | 11 | 31 | 292.0 | 18.49 | 392.0  | 15.4 |
| 55 | Validation control | N/A  | N/A    | N/A  | 0.64 | N/A   | 13 | 47 | 321.0 | 0.65  | 129.6  | 20.1 |
| 56 | Validation control | N/A  | N/A    | N/A  | N/A  | N/A   | 17 | 48 | 100.0 | 0.73  | 227.2  | 13.3 |
| 57 | Validation control | N/A  | N/A    | N/A  | 0.50 | N/A   | 3  | 32 | 128.0 | 0.64  | 97.7   | 11.3 |
| 58 | Validation control | N/A  | N/A    | N/A  | 0.14 | N/A   | 11 | 35 | 180.0 | 15.21 | 189.5  | 11.4 |
| 59 | Validation control | N/A  | N/A    | N/A  | 0.22 | N/A   | 11 | 37 | 215.0 | 2.40  | 344.4  | 14.5 |

\* Total mRNA was prepared from whole blood and HLA-DRA expression levels were assessed by quantitative polymerase chain reaction (qPCR). mRNA levels are normalized to peptidylpropylisomerase B (PPIB) using the delta-delta Ct method

TNF $\alpha$ : Tumor necrosis factor  $\alpha$ ; HLA-DRA: human leucocyte antigen DR alpha; SOFA: Sequential Organ Failure Assessment; SAPS II: Simplified Acute Physiology Score II; CRP: C-reactive protein; PCT: procalcitonin; IL6: interleukin-6; N/A: not applicable (data not available)
